# Supplementary material
Source: HighWire-hosted journal article supplement (https://erj.ersjournals.com/content/56/4/2002554)
Supplement: inline-supplementary-material-1 [file inline-supplementary-material-1.pdf]

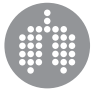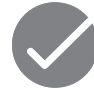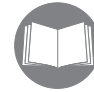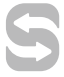

SHAREABLE PDF

# Confronting and mitigating the risk of COVID-19 associated pulmonary aspergillosis

Darius Armstrong-James<sup>1,13</sup>, Jonathan Youngs<sup>2</sup>, Tihana Bicanic<sup>2</sup>, Alireza Abdolrasouli<sup>3</sup>, David W. Denning <sup>4</sup>, Elizabeth Johnson<sup>5</sup>, Varun Mehra<sup>6</sup>, Tony Pagliuca<sup>6</sup>, Brijesh Patel<sup>7</sup>, Johanna Rhodes<sup>8</sup>, Silke Schelenz<sup>9</sup>, Anand Shah <sup>8,10</sup>, Frank L. van de Veerdonk<sup>11</sup>, Paul E. Verweij<sup>11</sup>, P. Lewis White<sup>12</sup> and Matthew C. Fisher<sup>8,13</sup>

**Affiliations:** <sup>1</sup>Dept of Infectious Diseases, Imperial College London, London, UK. <sup>2</sup>Institute of Infection and Immunity, St George's University of London, London, UK. <sup>3</sup>Dept of Medical Microbiology, North West London Pathology, Imperial College Healthcare NHS Trust, London, UK. <sup>4</sup>Faculty of Biology, Medicine and Health, The University of Manchester, National Aspergillosis Centre, Wythenshawe Hospital and Manchester Academic Health Science Centre, Manchester, UK. <sup>5</sup>Mycology Reference Laboratory, Public Health England National Infection Service, Bristol, UK. <sup>6</sup>Dept of Haematological Medicine, Kings College Hospital NHS Foundation Trust, London, UK. <sup>7</sup>Dept of Surgery and Cancer, Faculty of Medicine, Imperial College London, London, UK. <sup>8</sup>MRC Center for Global Infectious Disease Analysis, School of Public Health, Imperial College London, London, UK. <sup>9</sup>Infection Sciences, Kings College Hospital NHS Foundation Trust, London, UK. <sup>10</sup>Royal Brompton and Harefield NHS Foundation Trust, London, UK. <sup>11</sup>Dept of Medical Microbiology and Centre of Expertise in Mycology Radboudumc/CWZ, Radboud University Medical Centre, Nijmegen, The Netherlands. <sup>12</sup>Mycology Reference Laboratory, Public Health Wales Microbiology Cardiff, Cardiff, UK. <sup>13</sup>D. Armstrong-James and Matthew C. Fisher contributed equally to this article as lead authors and supervised the work.

**Correspondence:** Darius Armstrong-James, Imperial College London, Dept of Infectious Diseases, Flowers Building, London, SW7 2AZ, UK. E-mail: d.armstrong@imperial.ac.uk

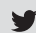

@ERSpublications

**Cases of COVID-19 associated pulmonary aspergillosis (CAPA) are being increasingly reported and physicians treating patients with COVID-19-related lung disease need to actively consider these fungal co-infections** <https://bit.ly/3feuGsQ>

**Cite this article as:** Armstrong-James D, Youngs J, Bicanic T, *et al.* Confronting and mitigating the risk of COVID-19 associated pulmonary aspergillosis. *Eur Respir J* 2020; 56: 2002554 [<https://doi.org/10.1183/13993003.02554-2020>].

This single-page version can be shared freely online.

The coronavirus disease 2019 (COVID-19) virus caused a wide spectrum of disease in healthy individuals, as well as those with common comorbidities [1]. Severe COVID-19 is characterised by acute respiratory distress syndrome (ARDS) secondary to viral pneumonitis, treatment of which may require mechanical ventilation or extracorporeal membrane oxygenation [2]. Clinicians are alert to the possibility of bacterial co-infection as a complication of lower respiratory tract viral infection; for example, a recent review found that 72% of patients with COVID-19 received antimicrobial therapy [3]. However, the risk of fungal co-infection, in particular COVID-19 associated pulmonary aspergillosis (CAPA), remains underappreciated.
